# Supplementary material for: Effect of sodium dodecyl sulfate on protein separation by hollow fiber flow field-flow fractionation
Source: Royal Society of Chemistry journal article supplement (doi:10.1039/c0an00172d), 2010-10-21
Supplement: c0an00172d.pdf [file c0an00172d.pdf]

Supplementary Table. Proteins identified from HF5 fractions of a human serum sample with or without denaturation and proteins identified from the same serum sample without HF5 separation. Membrane proteins are marked as bold characters.

| #  | Name                                                                                            | Accession     | MW       | peptides |            |             |
|----|-------------------------------------------------------------------------------------------------|---------------|----------|----------|------------|-------------|
|    |                                                                                                 |               |          | HF5      | HF5 in SDS | Without HF5 |
| 1  | 102 kDa protein                                                                                 | IPI00793403.1 | 102221.7 | 1        |            |             |
| 2  | 21 kDa protein                                                                                  | IPI00744985.1 | 21361.2  | 1        |            |             |
| 3  | 21 kDa protein                                                                                  | IPI00816378.1 | 21476.8  | 1        |            |             |
| 4  | 293 kDa protein                                                                                 | IPI00400765.2 | 292700.9 | 1        |            |             |
| 5  | 2-aminoadipic 6-semialdehyde dehydrogenase                                                      | IPI00419992.4 | 122518.8 | 1        |            |             |
| 6  | 31 kDa protein                                                                                  | IPI00166417.7 | 30556.0  | 1        |            |             |
| 7  | 34 kDa protein                                                                                  | IPI00796094.1 | 34405.0  | 1        |            |             |
| 8  | 36 kDa protein                                                                                  | IPI00477150.3 | 36441.6  | 1        |            |             |
| 9  | 38 kDa protein                                                                                  | IPI00008669.2 | 38461.3  | 1        |            |             |
| 10 | 45 kDa protein                                                                                  | IPI00022733.3 | 44818.4  | 1        |            |             |
| 11 | 5-aminolevulinic synthase, nonspecific, mitochondrial precursor                                 | IPI00007266.1 | 70535.7  | 1        |            |             |
| 12 | 8 kDa protein                                                                                   | IPI00791160.1 | 8273.3   | 1        |            |             |
| 13 | ADAMTS-15 precursor                                                                             | IPI00152637.1 | 103220.4 | 1        |            |             |
| 14 | ADARB2 protein                                                                                  | IPI00395952.1 | 14584.4  | 1        |            |             |
| 15 | alpha-2-glycoprotein 1, zinc                                                                    | IPI00166729.4 | 34237.1  | 1        |            |             |
| 16 | ataxia telangiectasia mutated protein isoform 2                                                 | IPI00289986.2 | 195850.9 | 1        |            |             |
| 17 | Beta crystallin B2                                                                              | IPI00218748.3 | 23365.4  | 1        |            |             |
| 18 | Beta-neoendorphin-dynorphin precursor                                                           | IPI00000832.1 | 28367.2  | 1        |            |             |
| 19 | <b>Bombesin receptor subtype-3</b>                                                              | IPI00027686.1 | 44382.1  | 1        |            |             |
| 20 | Brefeldin A-inhibited guanine nucleotide-exchange protein 2                                     | IPI00002186.4 | 201935.2 | 1        |            |             |
| 21 | CAD protein                                                                                     | IPI00301263.2 | 242827.1 | 1        |            |             |
| 22 | <b>CD180 antigen precursor</b>                                                                  | IPI00023722.1 | 74118.1  | 1        |            |             |
| 23 | CDNA FLJ14381 fis, clone HEMBA1001824, highly similar to Homo sapiens nuclear protein NP94 mRNA | IPI00064534.1 | 45902.7  | 1        |            |             |
| 24 | CDNA FLJ37932 fis, clone CTONG2004941                                                           | IPI00748804.1 | 18550.6  | 1        |            |             |
| 25 | CDNA FLJ39660 fis, clone SMINT2006801                                                           | IPI00176356.3 | 34219.0  | 1        |            |             |
| 26 | CDNA FLJ43079 fis, clone BRTHA3016917, weakly similar to Valyl-tRNA synthetase 2                | IPI00289801.2 | 55086.8  | 1        |            |             |
| 27 | centaurin, gamma 3 isoform a                                                                    | IPI00163185.8 | 97890.8  | 1        |            |             |
| 28 | CGI-07 protein                                                                                  | IPI00101049.2 | 57548.0  | 2        |            |             |
| 29 | Chromosome 14 open reading frame 131                                                            | IPI00001180.2 | 45598.7  | 1        |            |             |
| 30 | Ciliary dynein heavy chain 7                                                                    | IPI00180384.2 | 460845.6 | 1        |            |             |
| 31 | CNKSR family member 3                                                                           | IPI00411298.5 | 61864.9  | 1        |            |             |
| 32 | CNOT6 protein                                                                                   | IPI00152061.3 | 10260.2  | 2        |            |             |
| 33 | Coagulation factor V                                                                            | IPI00022937.3 | 252146.1 | 2        |            |             |
| 34 | Coiled-coil domain-containing protein 22                                                        | IPI00022265.3 | 70712.3  | 1        |            |             |
| 35 | Conserved hypothetical protein                                                                  | IPI00748393.1 | 9695.0   | 1        |            |             |
| 36 | Conserved hypothetical protein                                                                  | IPI00646634.2 | 17192.8  | 2        |            |             |
| 37 | Conserved hypothetical protein                                                                  | IPI00743230.1 | 10488.2  | 3        |            |             |
| 38 | Cupredoxin domain containing protein                                                            | IPI00744009.1 | 10830.5  | 1        |            |             |
| 39 | CXXC-type zinc finger protein 6                                                                 | IPI00303112.2 | 235159.8 | 1        |            |             |
| 40 | <b>D(1A) dopamine receptor</b>                                                                  | IPI00010289.1 | 49261.4  | 1        |            |             |
| 41 | Dihydrofolate reductase-like protein 1                                                          | IPI00219558.3 | 21606.2  | 1        |            |             |
| 42 | Dysferlin_v1                                                                                    | IPI00020210.2 | 237228.6 | 1        |            |             |
| 43 | EF-hand calcium binding domain 4B                                                               | IPI00013398.2 | 45563.7  | 1        |            |             |
| 44 | Estrogen sulfotransferase                                                                       | IPI00028623.1 | 35103.6  | 1        |            |             |
| 45 | Eukaryotic translation initiation factor 2 subunit 3                                            | IPI00297982.7 | 51077.3  | 1        |            |             |
| 46 | Glutathione peroxidase 1                                                                        | IPI00745331.1 | 19892.2  | 1        |            |             |
| 47 | GREB1 protein isoform a                                                                         | IPI00478472.2 | 216545.6 | 2        |            |             |
| 48 | Hemoglobin subunit delta                                                                        | IPI00473011.3 | 16045.3  | 1        |            |             |
| 49 | Hemoglobin subunit epsilon                                                                      | IPI00217471.3 | 16192.5  | 1        |            |             |
| 50 | HSF1 protein (Fragment)                                                                         | IPI00654729.1 | 21684.5  | 1        |            |             |
| 51 | Hypothetical protein                                                                            | IPI00383271.2 | 11844.7  | 1        |            |             |
| 52 | Hypothetical protein                                                                            | IPI00746924.1 | 4399.0   | 1        |            |             |
| 53 | Hypothetical protein                                                                            | IPI00788979.1 | 14529.4  | 1        |            |             |

|     |                                                                                     |               |          |   |
|-----|-------------------------------------------------------------------------------------|---------------|----------|---|
| 54  | Hypothetical protein                                                                | IPI00789489.1 | 20083.8  | 1 |
| 55  | Hypothetical protein DKFZp686C2281                                                  | IPI00470874.1 | 71816.0  | 1 |
| 56  | Hypothetical protein FLJ25416                                                       | IPI00217620.3 | 111478.8 | 1 |
| 57  | hypothetical protein LOC221322                                                      | IPI00253835.6 | 144662.6 | 1 |
| 58  | Hypothetical protein LOC222967                                                      | IPI00168608.2 | 100493.7 | 1 |
| 59  | hypothetical protein LOC84848                                                       | IPI00807433.1 | 19659.1  | 2 |
| 60  | IMP dehydrogenase/GMP reductase family protein                                      | IPI00306791.2 | 143772.1 | 1 |
| 61  | Isoform 1 of Bullous pemphigoid antigen 1, isoforms 1/2/3/4/5/8 (Fragment)          | IPI00008756.5 | 371976.9 | 1 |
| 62  | Isoform 1 of Calpain-9                                                              | IPI00009063.1 | 79046.8  | 1 |
| 63  | <b>Isoform 1 of CD166 antigen precursor</b>                                         | IPI00015102.2 | 65061.2  | 1 |
| 64  | <b>Isoform 1 of CMRF35-H antigen precursor</b>                                      | IPI00414784.4 | 33179.9  | 1 |
| 65  | Isoform 1 of Disks large-associated protein 2 (Fragment)                            | IPI00033086.4 | 113767.5 | 1 |
| 66  | <b>Isoform 1 of Exostosin-2</b>                                                     | IPI00004047.1 | 82202.0  | 1 |
| 67  | Isoform 1 of Gametogenetin                                                          | IPI00167943.3 | 66657.6  | 1 |
| 68  | Isoform 1 of Gamma-tubulin complex component 2                                      | IPI00029705.2 | 102469.0 | 1 |
| 69  | Isoform 1 of Histone-arginine methyltransferase CARM1                               | IPI00412880.2 | 63419.3  | 1 |
| 70  | Isoform 1 of IWS1 homolog                                                           | IPI00296432.1 | 91899.2  | 1 |
| 71  | Isoform 1 of JmjC domain-containing histone demethylation protein 3C                | IPI00027642.5 | 119904.8 | 1 |
| 72  | Isoform 1 of Nitric oxide synthase, inducible                                       | IPI00017304.1 | 131033.4 | 1 |
| 73  | Isoform 1 of PDZ domain-containing RING finger protein 3                            | IPI00010322.5 | 119521.0 | 1 |
| 74  | Isoform 1 of Plexin-A2 precursor                                                    | IPI00719621.2 | 212518.0 | 1 |
| 75  | <b>Isoform 1 of PX domain-containing protein kinase-like protein</b>                | IPI00479912.3 | 64909.1  | 1 |
| 76  | <b>Isoform 1 of Roundabout homolog 1 precursor</b>                                  | IPI00219798.1 | 180816.9 | 1 |
| 77  | Isoform 1 of Signal peptide, CUB and EGF-like domain-containing protein 2 precursor | IPI00024880.2 | 109884.1 | 1 |
| 78  | Isoform 1 of Transient receptor potential cation channel subfamily M member 3       | IPI00328399.2 | 197402.3 | 1 |
| 79  | Isoform 1 of Uncharacterized protein C10orf118                                      | IPI00470582.2 | 103622.9 | 1 |
| 80  | Isoform 1 of Uncharacterized protein C12orf42                                       | IPI00294828.9 | 39699.1  | 1 |
| 81  | Isoform 1 of Uncharacterized protein C14orf104                                      | IPI00018698.3 | 36920.1  | 1 |
| 82  | Isoform 1 of Wings apart-like protein homolog                                       | IPI00375330.6 | 132862.6 | 1 |
| 83  | Isoform 1 of WW domain-binding protein 7                                            | IPI00218823.3 | 293509.4 | 1 |
| 84  | Isoform 1 of Zinc finger and BTB domain-containing protein 44                       | IPI00419939.3 | 63807.2  | 1 |
| 85  | Isoform 10 of Myotonin-protein kinase                                               | IPI00215958.1 | 59752.1  | 1 |
| 86  | Isoform 2 of Basic FGF-repressed Zic-binding protein                                | IPI00219889.2 | 31497.0  | 1 |
| 87  | Isoform 2 of E3 ubiquitin-protein ligase RING1                                      | IPI00455876.2 | 39121.2  | 1 |
| 88  | <b>Isoform 2 of Leukocyte-associated immunoglobulin-like receptor 1 precursor</b>   | IPI00028015.2 | 29821.1  | 1 |
| 89  | Isoform 2 of Microtubule-associated serine/threonine-protein kinase 2               | IPI00480046.2 | 176022.2 | 1 |
| 90  | <b>Isoform 2 of Netrin receptor UNC5D precursor</b>                                 | IPI00103755.1 | 105423.8 | 1 |
| 91  | Isoform 2 of PDZ and LIM domain protein 2                                           | IPI00383278.3 | 23115.9  | 1 |
| 92  | Isoform 2 of Proline-rich protein 12                                                | IPI00181759.6 | 121841.7 | 1 |
| 93  | Isoform 2 of Reelin precursor                                                       | IPI00241562.3 | 387964.7 | 1 |
| 94  | <b>Isoform 2 of Vacuolar protein sorting-associated protein 53 homolog</b>          | IPI00181824.1 | 76303.4  | 1 |
| 95  | Isoform 3 of PAP-associated domain-containing protein 5                             | IPI00643763.2 | 68319.2  | 1 |
| 96  | Isoform 3 of PCI domain-containing protein 2                                        | IPI00072541.4 | 43346.5  | 1 |
| 97  | <b>Isoform 3 of Protein GPR107 precursor</b>                                        | IPI00184474.7 | 33363.3  | 1 |
| 98  | Isoform 3 of Serine/threonine-protein kinase SMG1                                   | IPI00183368.7 | 340512.9 | 1 |
| 99  | Isoform 3 of Uncharacterized protein KIAA0423                                       | IPI00439761.4 | 166060.0 | 1 |
| 100 | Isoform 4 of Vacuolar protein sorting-associated protein 13B                        | IPI00376436.1 | 97308.6  | 1 |
| 101 | Isoform A of Arachidonate 15-lipoxygenase type II                                   | IPI00005781.3 | 75851.0  | 1 |
| 102 | Isoform B of Oxysterol-binding protein-related protein 1                            | IPI00075080.2 | 108401.1 | 1 |
| 103 | <b>Isoform JM-A of Receptor tyrosine-protein</b>                                    | IPI00016371.1 | 146712.7 | 1 |

|     |                                                                                                                      |               |          |   |
|-----|----------------------------------------------------------------------------------------------------------------------|---------------|----------|---|
|     | <b>kinase erbB-4 precursor</b>                                                                                       |               |          |   |
| 104 | Isoform Long of Protein-glutamine gamma-glutamyltransferase 5                                                        | IPI00012876.8 | 80797.6  | 1 |
| 105 | <b>Isoform Long of Protocadherin alpha C2 precursor</b>                                                              | IPI00001516.1 | 109382.8 | 1 |
| 106 | Isoform Long of Segment polarity protein dishevelled homolog DVL-1-like                                              | IPI00008404.1 | 73208.2  | 1 |
| 107 | <b>Isoform Long of Very low-density lipoprotein receptor precursor</b>                                               | IPI00024273.1 | 96035.5  | 1 |
| 108 | Isoform PLD1A of Phospholipase D1                                                                                    | IPI00012865.1 | 124105.9 | 1 |
| 109 | Isoform XB of Tenascin-X precursor                                                                                   | IPI00025276.1 | 464165.9 | 1 |
| 110 | <b>Jagged-1 precursor</b>                                                                                            | IPI00099650.2 | 133708.4 | 1 |
| 111 | KIAA1546 protein (Fragment)                                                                                          | IPI00175151.5 | 90002.2  | 1 |
| 112 | Laminin subunit alpha-1 precursor                                                                                    | IPI00375294.2 | 336939.6 | 1 |
| 113 | Leucine-rich alpha-2-glycoprotein precursor                                                                          | IPI00022417.4 | 38154.1  | 1 |
| 114 | Lipoamide acyltransferase component of branched-chain alpha-keto acid dehydrogenase complex, mitochondrial precursor | IPI00003944.1 | 53453.0  | 1 |
| 115 | Low-density lipoprotein receptor-related protein 2 precursor                                                         | IPI00024292.1 | 521587.6 | 1 |
| 116 | LP8151                                                                                                               | IPI00428712.1 | 18345.3  | 1 |
| 117 | <b>LRAP protein</b>                                                                                                  | IPI00382999.1 | 40034.4  | 1 |
| 118 | LRRFIP1 protein                                                                                                      | IPI00386687.2 | 71733.3  | 1 |
| 119 | Lumican precursor                                                                                                    | IPI00020986.2 | 38404.8  | 2 |
| 120 | Lysosomal protective protein precursor                                                                               | IPI00021794.8 | 54431.2  | 1 |
| 121 | Lysyl oxidase homolog 4 precursor                                                                                    | IPI00306402.3 | 84429.1  | 1 |
| 122 | methyltransferase like 2B                                                                                            | IPI00181997.7 | 43398.3  | 1 |
| 123 | Microsomal triglyceride transfer protein large subunit precursor                                                     | IPI00296645.3 | 99288.9  | 1 |
| 124 | mitochondrial ribosomal protein L42 isoform b                                                                        | IPI00332525.6 | 16591.0  | 1 |
| 125 | Mitogen-activated protein kinase 4                                                                                   | IPI00010156.1 | 62583.9  | 1 |
| 126 | Multimerin-1 precursor                                                                                               | IPI00012269.2 | 138078.2 | 1 |
| 127 | Myosin-XV                                                                                                            | IPI00152380.3 | 394925.0 | 1 |
| 128 | Nedd4 binding protein 1                                                                                              | IPI00005667.3 | 100315.8 | 1 |
| 129 | Nucleoprotein TPR                                                                                                    | IPI00022970.4 | 265705.0 | 1 |
| 130 | Paired amphipathic helix protein Sin3a                                                                               | IPI00170596.1 | 145084.2 | 1 |
| 131 | PDZ and LIM domain protein 5                                                                                         | IPI00007935.4 | 63931.6  | 1 |
| 132 | Plasma retinol-binding protein precursor                                                                             | IPI00022420.3 | 22995.3  | 2 |
| 133 | Plexin-A1 precursor                                                                                                  | IPI00552671.2 | 210951.9 | 1 |
| 134 | <b>potassium channel, subfamily T, member 2</b>                                                                      | IPI00398421.1 | 130417.2 | 2 |
| 135 | Probable histone-lysine N-methyltransferase ASH1L                                                                    | IPI00020546.2 | 332580.0 | 1 |
| 136 | Procollagen C-endopeptidase enhancer 1 precursor                                                                     | IPI00299738.1 | 47942.0  | 1 |
| 137 | Profilin-4                                                                                                           | IPI00169306.1 | 14310.4  | 1 |
| 138 | <b>Proteinase-activated receptor 1 precursor</b>                                                                     | IPI00296869.5 | 47409.2  | 1 |
| 139 | Putative uncharacterized protein C14orf70                                                                            | IPI00384149.1 | 12081.4  | 1 |
| 140 | R3H domain containing 2                                                                                              | IPI00007227.5 | 75262.2  | 2 |
| 141 | Regenerating islet-derived protein 3 gamma precursor                                                                 | IPI00394807.3 | 19317.4  | 1 |
| 142 | Retinoblastoma-associated protein                                                                                    | IPI00302829.5 | 106091.7 | 1 |
| 143 | Rheumatoid factor D5 light chain (Fragment)                                                                          | IPI00816799.1 | 12758.5  | 1 |
| 144 | Rho GTPase activating protein 20                                                                                     | IPI00012622.5 | 132524.5 | 1 |
| 145 | similar to 60S ribosomal protein L23a                                                                                | IPI00001310.8 | 17702.8  | 1 |
| 146 | similar to apical early endosomal glycoprotein                                                                       | IPI00238575.5 | 131248.7 | 1 |
| 147 | similar to BAH domain and coiled-coil containing 1                                                                   | IPI00737760.2 | 289562.6 | 1 |
| 148 | similar to CG3173-PA isoform 7                                                                                       | IPI00737363.2 | 256321.7 | 1 |
| 149 | similar to fem-1 homolog a                                                                                           | IPI00335181.4 | 31180.9  | 1 |
| 150 | similar to growth inhibition and differentiation related protein 86                                                  | IPI00000264.4 | 53226.7  | 1 |
| 151 | Similar to hepatitis C virus core-binding protein 6; cervical cancer oncogene 3                                      | IPI00374136.3 | 16468.6  | 1 |
| 152 | similar to hepatoma-derived growth factor-related protein 2                                                          | IPI00787284.1 | 35456.7  | 1 |
| 153 | similar to kelch-like 9                                                                                              | IPI00052403.5 | 74976.6  | 1 |
| 154 | similar to postmeiotic segregation increased 2-like                                                                  | IPI00787642.1 | 47727.6  | 1 |

|     |                                                                                                                                                                    |               |           |   |
|-----|--------------------------------------------------------------------------------------------------------------------------------------------------------------------|---------------|-----------|---|
| 2   |                                                                                                                                                                    |               |           |   |
| 155 | similar to StAR-related lipid transfer protein 9                                                                                                                   | IPI00514002.3 | 477345.3  | 2 |
| 156 | similar to Ubiquitin carboxyl-terminal hydrolase 22 (Ubiquitin thioesterase 22) (Ubiquitin-specific-processing protease 22) (Deubiquitinating enzyme 22) isoform 1 | IPI00010365.3 | 88153.1   | 1 |
| 157 | similar to zinc finger protein 91                                                                                                                                  | IPI00787512.1 | 20706.2   | 1 |
| 158 | Soluble CD44 (Fragment)                                                                                                                                            | IPI00743228.1 | 3939.3    | 1 |
| 159 | <b>solute carrier family 25, member 25 isoform c</b>                                                                                                               | IPI00289851.4 | 56087.0   | 1 |
| 160 | Structural maintenance of chromosomes protein 1B                                                                                                                   | IPI00479260.1 | 144589.1  | 1 |
| 161 | Suppressor of cytokine signaling 5                                                                                                                                 | IPI00022271.1 | 61207.5   | 1 |
| 162 | Suppressor of variegation 4-20 homolog 2                                                                                                                           | IPI00013441.3 | 52080.2   | 1 |
| 163 | Synaptotagmin-6                                                                                                                                                    | IPI00180851.6 | 57346.5   | 1 |
| 164 | Tektin-2                                                                                                                                                           | IPI00296387.2 | 50311.8   | 1 |
| 165 | <b>Tetratricopeptide repeat domain 26</b>                                                                                                                          | IPI00328172.1 | 64136.5   | 1 |
| 166 | Transforming gene product TGAT                                                                                                                                     | IPI00384882.1 | 29925.1   | 1 |
| 167 | Transmembrane protein 16M                                                                                                                                          | IPI00259382.6 | 10747.5   | 1 |
| 168 | transmembrane protein 63B                                                                                                                                          | IPI00514538.1 | 94896.3   | 1 |
| 169 | Tripartite motif-containing protein 17                                                                                                                             | IPI00479218.2 | 54383.2   | 1 |
| 170 | Uncharacterized protein C10orf6                                                                                                                                    | IPI00293188.5 | 131791.5  | 1 |
| 171 | Uncharacterized protein C20orf152                                                                                                                                  | IPI00097257.2 | 67468.4   | 1 |
| 172 | Uncharacterized protein C20orf175                                                                                                                                  | IPI00065532.5 | 66055.2   | 1 |
| 173 | UV radiation resistance-associated gene protein                                                                                                                    | IPI00002614.3 | 78102.3   | 1 |
| 174 | WD repeat protein 75                                                                                                                                               | IPI00217240.1 | 94438.4   | 1 |
| 175 | Zinc finger HIT domain-containing protein 4                                                                                                                        | IPI00640853.1 | 37195.3   | 1 |
| 176 | Zinc finger protein 2 homolog                                                                                                                                      | IPI00105638.4 | 52706.0   | 2 |
| 177 | Zinc finger protein 226                                                                                                                                            | IPI00302693.6 | 91861.7   | 1 |
| 178 | Zinc finger protein 337                                                                                                                                            | IPI00000110.3 | 86819.3   | 1 |
| 179 | Zinc finger protein 366                                                                                                                                            | IPI00167408.1 | 85052.1   | 1 |
| 180 | Zinc finger protein 646                                                                                                                                            | IPI00004419.3 | 200634.6  | 1 |
| 181 | Zinc finger protein 677                                                                                                                                            | IPI00334201.1 | 67952.6   | 2 |
| 182 | 5 kDa protein                                                                                                                                                      | IPI00796536.1 | 5309.6    | 2 |
| 183 | ALB protein                                                                                                                                                        | IPI00216773.4 | 45130.5   | 1 |
| 184 | Ankyrin repeat domain-containing protein 15                                                                                                                        | IPI00339320.5 | 147196.0  | 1 |
| 185 | CDNA FLJ41733 fis, clone HLUNG2017806                                                                                                                              | IPI00410542.1 | 19222.6   | 1 |
| 186 | Conserved hypothetical protein                                                                                                                                     | IPI00745193.1 | 20604.7   | 1 |
| 187 | hematopoietic signal peptide-containing isoform 2                                                                                                                  | IPI00419642.2 | 27329.8   | 1 |
| 188 | Histidine-rich glycoprotein precursor                                                                                                                              | IPI00022371.1 | 59540.9   | 2 |
| 189 | hydrocephalus inducing isoform a                                                                                                                                   | IPI00647188.2 | 575454.6  | 1 |
| 190 | hypothetical protein                                                                                                                                               | IPI00374301.5 | 98339.7   | 1 |
| 191 | Hypothetical protein DKFZp686A21204                                                                                                                                | IPI00384911.3 | 113485.2  | 1 |
| 192 | Hypothetical short protein                                                                                                                                         | IPI00796405.1 | 7528.7    | 1 |
| 193 | Ig kappa chain V-III region B6                                                                                                                                     | IPI00387113.1 | 11627.8   | 1 |
| 194 | <b>Isoform 1 of 2-acylglycerol O-acyltransferase 3</b>                                                                                                             | IPI00328886.2 | 38704.9   | 1 |
| 195 | <b>Isoform 2 of Integral membrane protein GPR175</b>                                                                                                               | IPI00103792.4 | 26271.8   | 1 |
| 196 | Isoform 2 of Nuclear mitotic apparatus protein 1                                                                                                                   | IPI00006196.2 | 236385.3  | 1 |
| 197 | Isoform 2 of Titin                                                                                                                                                 | IPI00023283.3 | 3802596.0 | 1 |
| 198 | Isoform 4 of Zinc finger protein 41                                                                                                                                | IPI00221195.1 | 79487.0   | 1 |
| 199 | Keratin, type I cytoskeletal 10                                                                                                                                    | IPI00009865.1 | 59482.8   | 1 |
| 200 | Keratin, type I cytoskeletal 9                                                                                                                                     | IPI00019359.3 | 62091.8   | 1 |
| 201 | Keratin-associated protein 10-12                                                                                                                                   | IPI00394683.1 | 25088.1   | 2 |
| 202 | <b>Killer cell lectin-like receptor subfamily B member 1</b>                                                                                                       | IPI00032471.2 | 25398.8   | 1 |
| 203 | Oxygen-regulated protein 1                                                                                                                                         | IPI00011044.1 | 240509.6  | 1 |
| 204 | Serum paraoxonase/arylesterase 1                                                                                                                                   | IPI00218732.3 | 39724.2   | 1 |
| 205 | 13 kDa protein                                                                                                                                                     | IPI00141902.4 | 13373.3   | 1 |
| 206 | 14 kDa protein                                                                                                                                                     | IPI00032188.2 | 13756.2   | 1 |
| 207 | 15 kDa protein                                                                                                                                                     | IPI00747405.1 | 14984.8   | 1 |
| 208 | 17 kDa protein                                                                                                                                                     | IPI00790286.1 | 16771.1   | 1 |
| 209 | 17 kDa protein                                                                                                                                                     | IPI00790483.1 | 17338.9   | 1 |
| 210 | 18 kDa protein                                                                                                                                                     | IPI00246556.3 | 17525.1   | 1 |
| 211 | 1-phosphatidylinositol-4,5-bisphosphate phosphodiesterase gamma 1                                                                                                  | IPI00016736.1 | 148437.5  | 1 |

|     |                                                                                                                      |               |          |   |
|-----|----------------------------------------------------------------------------------------------------------------------|---------------|----------|---|
| 212 | 23 kDa protein                                                                                                       | IPI00796255.1 | 22712.6  | 1 |
| 213 | 240 kDa protein                                                                                                      | IPI00178675.2 | 240192.9 | 1 |
| 214 | 26 kDa protein                                                                                                       | IPI00816390.1 | 25667.8  | 1 |
| 215 | 281 kDa protein                                                                                                      | IPI00395649.1 | 281008.5 | 1 |
| 216 | 37 kDa protein                                                                                                       | IPI00789310.1 | 36703.1  | 1 |
| 217 | 38kDa splicing factor                                                                                                | IPI00746612.1 | 34268.7  | 1 |
| 218 | 49 kDa protein                                                                                                       | IPI00300945.7 | 48901.5  | 1 |
| 219 | 5 kDa protein                                                                                                        | IPI00790676.1 | 4765.0   | 1 |
| 220 | 57 kDa protein                                                                                                       | IPI00383111.2 | 56527.8  | 1 |
| 221 | 82 kDa protein                                                                                                       | IPI00641785.4 | 82156.7  | 1 |
| 222 | ACF7 protein                                                                                                         | IPI00183169.5 | 450141.7 | 1 |
| 223 | Acyl-CoA-binding domain-containing protein 7                                                                         | IPI00398874.4 | 9784.1   | 1 |
| 224 | ALMS1                                                                                                                | IPI00178743.4 | 460907.3 | 1 |
| 225 | Apolipoprotein E precursor                                                                                           | IPI00021842.1 | 36131.8  | 2 |
| 226 | <b>ATP12A protein</b>                                                                                                | IPI00008161.8 | 115979.5 | 1 |
| 227 | <b>ATP-binding cassette sub-family A member 3</b>                                                                    | IPI00017800.2 | 191237.8 | 1 |
| 228 | BRCA1-associated RING domain protein 1                                                                               | IPI00017746.2 | 86593.0  | 1 |
| 229 | C4b-binding protein alpha chain precursor                                                                            | IPI00021727.1 | 66989.4  | 1 |
| 230 | Calponin-1                                                                                                           | IPI00021264.1 | 33149.6  | 1 |
| 231 | <b>Cd002 protein</b>                                                                                                 | IPI00165651.1 | 43466.5  | 1 |
| 232 | CDC42 GAP-related protein (Fragment)                                                                                 | IPI00382580.1 | 25209.1  | 2 |
| 233 | CDNA FLJ16301 fis, clone PLACE7000333                                                                                | IPI00442234.1 | 28014.8  | 1 |
| 234 | CDNA FLJ20306 fis, clone HEP06881                                                                                    | IPI00015650.1 | 13764.3  | 1 |
| 235 | CDNA FLJ23658 fis, clone COLF3416                                                                                    | IPI00152702.3 | 54104.1  | 1 |
| 236 | CDNA FLJ30134 fis, clone BRACE1000187,<br>weakly similar to MICROTUBULE-<br>ASSOCIATED PROTEIN 4                     | IPI00043863.1 | 58520.4  | 1 |
| 237 | <b>CDNA FLJ34089 fis, clone FCBBF3006249,<br/>moderately similar to Mus musculus prominin-<br/>like protein mRNA</b> | IPI00177880.3 | 86199.9  | 1 |
| 238 | CDNA: FLJ22761 fis, clone KAIA0893                                                                                   | IPI00302502.5 | 36565.9  | 1 |
| 239 | Cell division cycle 2-related protein kinase 7                                                                       | IPI00021175.1 | 164053.2 | 1 |
| 240 | Cell division cycle protein 20 homolog                                                                               | IPI00329526.3 | 54688.7  | 1 |
| 241 | Cell division protein kinase 6                                                                                       | IPI00023529.1 | 36915.1  | 1 |
| 242 | <b>Chloride anion exchanger</b>                                                                                      | IPI00031036.1 | 84451.3  | 1 |
| 243 | Coagulation factor XII precursor                                                                                     | IPI00019581.1 | 67774.1  | 1 |
| 244 | coiled-coil domain containing 66                                                                                     | IPI00401020.6 | 96569.6  | 1 |
| 245 | Coiled-coil domain-containing protein 14                                                                             | IPI00396060.2 | 83547.6  | 1 |
| 246 | Coiled-coil domain-containing protein 25                                                                             | IPI00396174.4 | 24463.1  | 1 |
| 247 | Collagen alpha-2(V) chain precursor                                                                                  | IPI00739099.1 | 144631.1 | 1 |
| 248 | complement component 4B preproprotein                                                                                | IPI00418163.3 | 192629.6 | 1 |
| 249 | Complement component C6 precursor                                                                                    | IPI00009920.2 | 105683.3 | 1 |
| 250 | Conserved hypothetical protein                                                                                       | IPI00745149.1 | 7106.9   | 1 |
| 251 | <b>contactin associated protein-like 5 isoform 1</b>                                                                 | IPI00292300.3 | 145530.2 | 1 |
| 252 | CRSP complex subunit 6                                                                                               | IPI00301139.5 | 72830.6  | 1 |
| 253 | Cytoskeleton-associated protein 2-like                                                                               | IPI00328291.2 | 83535.3  | 1 |
| 254 | <b>DC-STAMP domain containing 1</b>                                                                                  | IPI00641631.1 | 75687.8  | 1 |
| 255 | Dihydropyrimidinase-related protein 4                                                                                | IPI00022388.2 | 61838.5  | 1 |
| 256 | DNA repair protein RAD51 homolog 3                                                                                   | IPI00012829.1 | 42162.9  | 1 |
| 257 | Dynein intermediate chain 1, axonemal                                                                                | IPI00006030.1 | 79232.8  | 1 |
| 258 | E3 SUMO-protein ligase RanBP2                                                                                        | IPI00221325.3 | 357972.3 | 1 |
| 259 | echinoderm microtubule associated protein like 5                                                                     | IPI00418790.2 | 208721.2 | 1 |
| 260 | <b>Endothelial cells scavenger receptor precursor</b>                                                                | IPI00066367.1 | 87372.9  | 1 |
| 261 | Endothelial zinc finger protein induced by tumor<br>necrosis factor alpha                                            | IPI00021547.2 | 54462.4  | 1 |
| 262 | <b>eukaryotic translation initiation factor 2-alpha<br/>kinase 3</b>                                                 | IPI00303053.5 | 125153.4 | 1 |
| 263 | Eukaryotic translation initiation factor 5A-2                                                                        | IPI00006935.3 | 16782.2  | 1 |
| 264 | family with sequence similarity 13, member A1<br>isoform a                                                           | IPI00006680.2 | 116859.0 | 1 |
| 265 | FH1/FH2 domain-containing protein                                                                                    | IPI00001730.3 | 126472.8 | 1 |
| 266 | Fibroblast growth factor 13                                                                                          | IPI00552068.2 | 29441.8  | 1 |
| 267 | <b>FKBP12-rapamycin complex-associated protein</b>                                                                   | IPI00031410.1 | 288705.3 | 1 |
| 268 | FLJ00280 protein (Fragment)                                                                                          | IPI00442358.1 | 47075.4  | 1 |
| 269 | Gigaxonin                                                                                                            | IPI00022758.3 | 67594.8  | 1 |
| 270 | <b>Glycerophosphodiester phosphodiesterase</b>                                                                       | IPI00102275.3 | 61688.5  | 1 |

|     |                                                                                           |                    |          |   |
|-----|-------------------------------------------------------------------------------------------|--------------------|----------|---|
|     | <b>domain-containing protein 2</b>                                                        |                    |          |   |
| 271 | GMP synthase                                                                              | IPI00029079.5      | 76667.1  | 1 |
| 272 | <b>Granzyme M precursor</b>                                                               | IPI00016282.1      | 27428.5  | 1 |
| 273 | H_YH95C04.1 protein (Fragment)                                                            | IPI00026189.1      | 15570.0  | 1 |
| 274 | H53_GS1 (Fragment)                                                                        | IPI00307702.3      | 57980.4  | 1 |
| 275 | <b>Heat-stable enterotoxin receptor precursor</b>                                         | IPI00012491.1      | 123289.8 | 1 |
| 276 | HECT domain and RCC1-like domain-containing protein 2                                     | IPI00005826.1      | 527139.8 | 1 |
| 277 | HERV-K_5q33.3 provirus ancestral Pol protein                                              | IPI00382531.2      | 114754.0 | 1 |
| 278 | Histone acetyltransferase p300                                                            | IPI00020985.3      | 263971.7 | 1 |
| 279 | HLA class II histocompatibility antigen, DW2.2/DR2.2 beta chain (Fragment)                | IPI00472169.1      | 22950.3  | 1 |
| 280 | Homeobox protein HMX1                                                                     | IPI00004379.3      | 39201.2  | 1 |
| 281 | Hook homolog 1                                                                            | IPI00026305.1      | 84594.8  | 1 |
| 282 | HsKin17 protein                                                                           | IPI00017580.1      | 45345.5  | 1 |
| 283 | human immunodeficiency virus type I enhancer binding protein 1                            | IPI00783879.2      | 296680.1 | 1 |
| 284 | <b>hyaluronoglucosaminidase 4</b>                                                         | IPI00099438.2      | 54214.4  | 1 |
| 285 | hypothetical protein                                                                      | IPI00255145.5      | 104800.4 | 1 |
| 286 | Hypothetical protein                                                                      | IPI00447507.1      | 23862.3  | 1 |
| 287 | Hypothetical protein                                                                      | IPI00450939.1      | 4215.4   | 1 |
| 288 | Hypothetical protein DKFZp686H02133                                                       | IPI00018026.2      | 51134.8  | 1 |
| 289 | <b>Hypothetical protein LOC162073</b>                                                     | IPI00183879.2      | 58409.3  | 1 |
| 290 | hypothetical protein LOC375316                                                            | IPI00738852.3      | 117910.9 | 1 |
| 291 | hypothetical protein LOC51237                                                             | IPI00102821.4      | 20681.2  | 1 |
| 292 | hypothetical protein LOC80208                                                             | IPI00101923.6      | 278687.7 | 1 |
| 293 | Hypothetical protein LOC90693                                                             | IPI00061448.5      | 12521.7  | 1 |
| 294 | <b>IMP dehydrogenase/GMP reductase family protein</b>                                     | IPI00179851.3      | 124318.8 | 1 |
| 295 | IMP dehydrogenase/GMP reductase family protein                                            | IPI00217743.3      | 66301.4  | 1 |
| 296 | Intercellular adhesion molecule 3 precursor                                               | IPI00031620.1      | 59345.9  | 1 |
| 297 | <b>Intercellular adhesion molecule 5 precursor</b>                                        | IPI00290456.3      | 97270.1  | 1 |
| 298 | Interferon-induced protein with tetratricopeptide repeats 3                               | IPI00024254.3      | 55949.6  | 1 |
| 299 | Interleukin-19 precursor                                                                  | IPI00028480.1<br>3 | 20378.5  | 1 |
| 300 | Interleukin-7 precursor                                                                   | IPI00007748.1      | 20173.5  | 1 |
| 301 | invasion inhibitory protein 45 isoform 1                                                  | IPI00551070.2      | 42797.6  | 1 |
| 302 | Isoform 1 of 3-hydroxyacyl-CoA dehydrogenase type-2                                       | IPI00017726.1      | 26906.1  | 1 |
| 303 | Isoform 1 of Ankyrin repeat domain-containing protein 25                                  | IPI00470559.2      | 91118.0  | 1 |
| 304 | Isoform 1 of Ankyrin repeat domain-containing protein 47                                  | IPI00394818.4      | 88371.6  | 1 |
| 305 | Isoform 1 of AT-rich interactive domain-containing protein 1B                             | IPI00015404.2      | 235972.3 | 1 |
| 306 | Isoform 1 of Chromodomain helicase-DNA-binding protein 3                                  | IPI00373870.3      | 226447.9 | 1 |
| 307 | Isoform 1 of Collagen alpha-1(II) chain precursor                                         | IPI00186460.7      | 134307.6 | 1 |
| 308 | Isoform 1 of Cyclin-dependent kinase-like 3                                               | IPI00217158.1      | 67471.2  | 1 |
| 309 | <b>Isoform 1 of Dedicator of cytokinesis protein 9</b>                                    | IPI00151888.4      | 236293.6 | 1 |
| 310 | Isoform 1 of DNA-directed RNA polymerase I-associated factor 53 kDa subunit               | IPI00251989.2      | 53928.0  | 1 |
| 311 | Isoform 1 of Ectonucleotide pyrophosphatase/phosphodiesterase 2                           | IPI00156171.2      | 98939.6  | 1 |
| 312 | Isoform 1 of Epidermal growth factor receptor kinase substrate 8-like protein 3           | IPI00181833.3      | 66819.5  | 1 |
| 313 | Isoform 1 of Fork head domain transcription factor AFX1                                   | IPI00024316.3      | 53650.9  | 1 |
| 314 | Isoform 1 of Fragile X mental retardation 1 protein                                       | IPI00215720.1      | 66929.7  | 1 |
| 315 | Isoform 1 of Homeobox protein cut-like 1                                                  | IPI00026673.4      | 164171.7 | 1 |
| 316 | <b>Isoform 1 of Leukocyte immunoglobulin-like receptor subfamily A member 1 precursor</b> | IPI00009984.5      | 53241.1  | 1 |
| 317 | Isoform 1 of Melanoma-associated antigen D2                                               | IPI00009542.1      | 64914.5  | 1 |
| 318 | Isoform 1 of Microtubule-associated serine/threonine-protein kinase-like                  | IPI00074258.3      | 97257.1  | 1 |

## Supplementary Material (ESI) for Analyst

This journal is (C) The Royal Society of Chemistry 2010

|     |                                                                                                |               |          |   |
|-----|------------------------------------------------------------------------------------------------|---------------|----------|---|
| 319 | Isoform 1 of Myosin-10                                                                         | IPI00397526.2 | 228796.8 | 1 |
| 320 | <b>Isoform 1 of Myotubularin-related protein 13</b>                                            | IPI00654703.2 | 208331.4 | 1 |
| 321 | <b>Isoform 1 of Nasal embryonic luteinizing hormone-releasing hormone factor</b>               | IPI00465371.1 | 60105.5  | 1 |
| 322 | <b>Isoform 1 of Non-imprinted in Prader-Willi/Angelman syndrome region protein 1</b>           | IPI00394901.1 | 34539.4  | 1 |
| 323 | <b>Isoform 1 of Phosphatidylinositol 3,4,5-trisphosphate-dependent Rac exchanger 1 protein</b> | IPI00295252.1 | 186084.9 | 1 |
| 324 | <b>Isoform 1 of Plexin-D1 precursor</b>                                                        | IPI00412492.3 | 211958.5 | 1 |
| 325 | Isoform 1 of Probable ATP-dependent RNA helicase DDX31                                         | IPI00043990.3 | 94028.8  | 1 |
| 326 | Isoform 1 of Probable helicase senataxin                                                       | IPI00142538.3 | 302760.2 | 1 |
| 327 | Isoform 1 of Protein kinase-like protein Sgk071                                                | IPI00470568.3 | 75627.2  | 1 |
| 328 | Isoform 1 of Protein transport protein Sec61 subunit alpha isoform 1                           | IPI00218466.6 | 52230.6  | 1 |
| 329 | Isoform 1 of Putative Polycomb group protein ASXL1                                             | IPI00217537.2 | 165328.5 | 1 |
| 330 | <b>Isoform 1 of Receptor-type tyrosine-protein phosphatase T precursor</b>                     | IPI00013096.4 | 164241.1 | 1 |
| 331 | Isoform 1 of RING finger protein 31                                                            | IPI00094740.1 | 119575.1 | 2 |
| 332 | Isoform 1 of Slit homolog 2 protein precursor                                                  | IPI00006288.1 | 169758.5 | 1 |
| 333 | <b>Isoform 1 of Sodium channel beta-4 subunit precursor</b>                                    | IPI00217376.1 | 24953.3  | 1 |
| 334 | Isoform 1 of STE20-like serine/threonine-protein kinase                                        | IPI00022827.1 | 142606.8 | 1 |
| 335 | Isoform 1 of Tigger transposable element-derived protein 7                                     | IPI00170921.2 | 63196.5  | 1 |
| 336 | Isoform 1 of Transcription intermediary factor 1-beta                                          | IPI00438229.2 | 88493.5  | 1 |
| 337 | Isoform 1 of Ubiquitin-activating enzyme E1-like protein 2                                     | IPI00023647.4 | 117895.2 | 1 |
| 338 | Isoform 1 of Uncharacterized protein C18orf54 precursor                                        | IPI00217756.5 | 41784.7  | 1 |
| 339 | Isoform 1 of Uncharacterized protein C9orf153                                                  | IPI00514957.1 | 11246.8  | 1 |
| 340 | <b>Isoform 1 of Zinc finger FYVE domain-containing protein 16</b>                              | IPI00424460.3 | 168742.4 | 1 |
| 341 | Isoform 1 of Zinc finger protein 563                                                           | IPI00184499.2 | 55397.6  | 1 |
| 342 | Isoform 1 of Zinc finger protein 598                                                           | IPI00328737.2 | 98575.4  | 1 |
| 343 | Isoform 2 of Apolipoprotein-L1 precursor                                                       | IPI00186903.3 | 45843.0  | 1 |
| 344 | <b>Isoform 2 of Endoplasmic reticulum-Golgi intermediate compartment protein 3</b>             | IPI00472099.2 | 44799.4  | 1 |
| 345 | Isoform 2 of MutS protein homolog 5                                                            | IPI00172593.1 | 92944.6  | 1 |
| 346 | <b>Isoform 2 of N-acetylgalactosamine 4-sulfate 6-O-sulfotransferase</b>                       | IPI00384334.2 | 58071.8  | 2 |
| 347 | Isoform 2 of Scm-like with four MBT domains protein 1                                          | IPI00051243.3 | 93106.6  | 1 |
| 348 | <b>Isoform 2 of Sodium channel protein type 2 subunit alpha</b>                                | IPI00220666.2 | 228974.8 | 1 |
| 349 | Isoform 2 of Succinyl-CoA ligase [ADP-forming] beta-chain, mitochondrial precursor             | IPI00217232.2 | 48009.1  | 1 |
| 350 | Isoform 2 of Uncharacterized protein C7orf26                                                   | IPI00031632.1 | 39002.4  | 1 |
| 351 | Isoform 3 of Lysosomal-trafficking regulator                                                   | IPI00017094.9 | 429056.6 | 1 |
| 352 | Isoform 6 of ELMO domain-containing protein 3                                                  | IPI00796589.2 | 44316.2  | 1 |
| 353 | Isoform A of Hepatocyte nuclear factor 1-beta                                                  | IPI00020078.1 | 61285.5  | 1 |
| 354 | Isoform A of Protocadherin-7 precursor                                                         | IPI00001893.2 | 116033.6 | 1 |
| 355 | Isoform Ag of Odorant-binding protein 2a precursor                                             | IPI00221282.1 | 25997.4  | 1 |
| 356 | Isoform Short of Sulfotransferase 1C1                                                          | IPI00011290.1 | 34857.4  | 1 |
| 357 | Isoform UNPEL of Ubiquitin carboxyl-terminal hydrolase 4                                       | IPI00011836.2 | 108495.9 | 1 |
| 358 | Keratin-75                                                                                     | IPI00005859.2 | 59524.1  | 1 |
| 359 | KIAA1602 protein (Fragment)                                                                    | IPI00289029.5 | 94754.6  | 1 |
| 360 | Kinesin-like protein KIF15                                                                     | IPI00024975.2 | 160060.4 | 1 |
| 361 | Kinesin-like protein KIF26B                                                                    | IPI00397820.3 | 223741.7 | 1 |
| 362 | KRAB box family protein                                                                        | IPI00375655.4 | 54417.4  | 1 |

|     |                                                                            |               |          |   |
|-----|----------------------------------------------------------------------------|---------------|----------|---|
| 363 | KRT17 protein                                                              | IPI00747707.1 | 41046.8  | 1 |
| 364 | <b>Leucine-rich repeat-containing protein 8C</b>                           | IPI00152642.3 | 92332.1  | 1 |
| 365 | lipid storage droplet protein 5                                            | IPI00444179.2 | 57246.2  | 1 |
| 366 | <b>Macrophage receptor MARCO</b>                                           | IPI00009521.1 | 52625.4  | 1 |
| 367 | Melanoma-associated antigen E1                                             | IPI00015306.4 | 103189.7 | 1 |
| 368 | <b>Membrane-bound transcription factor site-1 protease precursor</b>       | IPI00021569.1 | 117674.0 | 1 |
| 369 | Mitogen-activated protein kinase kinase kinase 5                           | IPI00412433.1 | 154439.3 | 1 |
| 370 | MORC family CW-type zinc finger protein 4                                  | IPI00163550.2 | 106281.0 | 1 |
| 371 | Myeloid leukemia factor 2                                                  | IPI00023095.1 | 28129.2  | 1 |
| 372 | myomesin 1                                                                 | IPI00434580.4 | 187532.8 | 1 |
| 373 | Myosin-9                                                                   | IPI00019502.3 | 226390.6 | 1 |
| 374 | <b>NAG-5 protein</b>                                                       | IPI00009310.1 | 76497.4  | 1 |
| 375 | Neutrophil cytosol factor 2                                                | IPI00021070.3 | 59723.6  | 1 |
| 376 | <b>Nicotinic acid receptor 2</b>                                           | IPI00025628.2 | 44466.0  | 1 |
| 377 | OTTHUMP00000017446                                                         | IPI00642043.1 | 119238.5 | 1 |
| 378 | OTTHUMP00000031495                                                         | IPI00065547.2 | 15247.9  | 1 |
| 379 | OTTHUMP00000042125                                                         | IPI00335617.2 | 22023.6  | 1 |
| 380 | PAS domain containing 1                                                    | IPI00167383.2 | 87373.5  | 1 |
| 381 | <b>PDZ domain-containing guanine nucleotide exchange factor I</b>          | IPI00008865.3 | 137049.4 | 1 |
| 382 | <b>Peroxisomal membrane protein 11B</b>                                    | IPI00021978.1 | 28413.2  | 1 |
| 383 | Phosphatidylinositol N-acetylglucosaminyltransferase family protein        | IPI00745900.1 | 12440.3  | 1 |
| 384 | Polyribonucleotide nucleotidyltransferase 1, mitochondrial precursor       | IPI00291165.7 | 85896.7  | 1 |
| 385 | <b>Potassium voltage-gated channel subfamily B member 1</b>                | IPI00033019.2 | 95816.7  | 1 |
| 386 | PRO0327                                                                    | IPI00022982.1 | 14149.0  | 1 |
| 387 | Protein kinase C-binding protein NELL1 precursor                           | IPI00023754.3 | 89545.8  | 1 |
| 388 | Putative uncharacterized protein C1orf120                                  | IPI00374777.1 | 10259.9  | 1 |
| 389 | <b>Rab GDP dissociation inhibitor beta</b>                                 | IPI00031461.1 | 50630.9  | 1 |
| 390 | <b>Ral guanine nucleotide exchange factor RalGPS1A</b>                     | IPI00041588.1 | 58938.3  | 1 |
| 391 | RANBP2-like and GRIP domain-containing protein 7                           | IPI00100787.2 | 103268.9 | 1 |
| 392 | <b>Ras-related protein Rab-13</b>                                          | IPI00016373.3 | 22759.7  | 1 |
| 393 | Replication factor C subunit 3                                             | IPI00031521.1 | 40529.9  | 1 |
| 394 | RFVG5814                                                                   | IPI00432762.1 | 21150.9  | 1 |
| 395 | <b>Ribosomal protein SA</b>                                                | IPI00413108.4 | 33292.7  | 1 |
| 396 | RICS protein                                                               | IPI00480127.5 | 61423.1  | 1 |
| 397 | RNA polymerase-associated protein RTF1 homolog                             | IPI00303832.6 | 80264.7  | 2 |
| 398 | RNA-binding protein 27                                                     | IPI00292975.4 | 118644.7 | 1 |
| 399 | sarcoma antigen NY-SAR-79                                                  | IPI00418774.2 | 124076.9 | 1 |
| 400 | SEC31 homolog A isoform 4                                                  | IPI00305152.6 | 121574.8 | 1 |
| 401 | Semaphorin-3E precursor                                                    | IPI00004494.1 | 89170.5  | 1 |
| 402 | Serine arginine-rich pre-mRNA splicing factor SR-A1                        | IPI00303343.6 | 139186.2 | 1 |
| 403 | Serine-protein kinase ATM                                                  | IPI00298306.3 | 350417.1 | 1 |
| 404 | similar to brain specific homeobox                                         | IPI00375754.2 | 62213.8  | 1 |
| 405 | similar to CG10806-PB, isoform B                                           | IPI00397905.4 | 47300.5  | 1 |
| 406 | similar to DENN/MADD domain containing 4B isoform 1                        | IPI00006645.8 | 188353.9 | 1 |
| 407 | Similar to E2F transcription factor 7                                      | IPI00180615.6 | 79705.8  | 1 |
| 408 | Similar to HLA class I histocompatibility antigen, alpha chain H precursor | IPI00784212.1 | 10741.1  | 1 |
| 409 | similar to Kelch domain-containing protein 5                               | IPI00161103.3 | 49454.0  | 1 |
| 410 | similar to Protein cTAGE-6                                                 | IPI00740599.2 | 44744.1  | 1 |
| 411 | similar to sulfotransferase family 1A, member 2                            | IPI00735624.1 | 12372.2  | 1 |
| 412 | similar to T05C3.2                                                         | IPI00166979.6 | 197339.2 | 1 |
| 413 | similar to zinc finger protein 251                                         | IPI00556189.4 | 87345.5  | 1 |
| 414 | Stress-induced-phosphoprotein 1                                            | IPI00013894.1 | 62599.5  | 1 |
| 415 | Testis specific basic protein                                              | IPI00009536.1 | 63280.3  | 1 |
| 416 | TFIIH basal transcription factor complex helicase XPB subunit              | IPI00291364.5 | 89221.1  | 1 |
| 417 | Tight junction protein 2 (Zona occludens 2) isoform                        | IPI00556512.1 | 11882.0  | 1 |



|     |                                                                                       |               |          |    |    |  |  |    |
|-----|---------------------------------------------------------------------------------------|---------------|----------|----|----|--|--|----|
|     | 1 variant (Fragment)                                                                  |               |          |    |    |  |  |    |
| 418 | tRNA-splicing endonuclease subunit Sen34                                              | IPI00451941.5 | 33631.5  |    |    |  |  | 1  |
| 419 | Tumor necrosis factor receptor superfamily member 11B precursor                       | IPI00298362.3 | 46010.0  |    |    |  |  | 1  |
| 420 | Tyrosine-protein phosphatase non-receptor type 23                                     | IPI00034006.1 | 178860.3 |    |    |  |  | 1  |
| 421 | U6 snRNA-specific terminal uridylyltransferase 1                                      | IPI00010212.4 | 93788.5  |    |    |  |  | 1  |
| 422 | <b>Ubiquitin carboxyl-terminal hydrolase 32</b>                                       | IPI00185661.5 | 181539.7 |    |    |  |  | 1  |
| 423 | Uncharacterized protein C12orf4                                                       | IPI00006906.3 | 63760.3  |    |    |  |  | 1  |
| 424 | Uncharacterized protein C19orf15 precursor                                            | IPI00178100.4 | 132957.4 |    |    |  |  | 1  |
| 425 | Uncharacterized protein C2orf13                                                       | IPI00217108.1 | 56920.5  |    |    |  |  | 1  |
| 426 | Uncharacterized protein KIAA2022                                                      | IPI00238220.2 | 167444.5 |    |    |  |  | 1  |
| 427 | vitamin D-binding protein precursor                                                   | IPI00742696.2 | 52883.0  |    |    |  |  | 1  |
| 428 | WD repeat domain 21A isoform 2                                                        | IPI00292674.1 | 44132.5  |    |    |  |  | 1  |
| 429 | WD repeat protein 57                                                                  | IPI00006723.4 | 39285.7  |    |    |  |  | 1  |
| 430 | Wiskott-Aldrich syndrome protein family member 1                                      | IPI00022007.1 | 61614.2  |    |    |  |  | 1  |
| 431 | Zinc finger protein 3 homolog                                                         | IPI00064885.2 | 57624.6  |    |    |  |  | 2  |
| 432 | Zinc finger protein 525                                                               | IPI00167130.6 | 41686.1  |    |    |  |  | 1  |
| 433 | Zinc finger protein 680                                                               | IPI00168690.6 | 61757.6  |    |    |  |  | 1  |
| 434 | zinc finger protein 721                                                               | IPI00556434.2 | 106419.9 |    |    |  |  | 1  |
| 435 | Zinc finger protein ZIC 2                                                             | IPI00030652.2 | 54971.1  |    |    |  |  | 1  |
| 436 | ZXD family zinc finger C isoform 1                                                    | IPI00397977.7 | 25751.2  |    |    |  |  | 1  |
| 437 | 11 kDa protein                                                                        | IPI00792089.1 | 11284.5  | 1  | 1  |  |  | 1  |
| 438 | 187 kDa protein                                                                       | IPI00164623.4 | 187187.3 | 19 | 16 |  |  | 26 |
| 439 | 42 kDa protein                                                                        | IPI00796697.1 | 42240.1  | 1  | 1  |  |  | 1  |
| 440 | Afamin precursor                                                                      | IPI00019943.1 | 69024.1  | 5  | 1  |  |  | 1  |
| 441 | ALB protein                                                                           | IPI00022434.2 | 71657.7  | 26 | 6  |  |  | 13 |
| 442 | Alpha-1-antitrypsin precursor                                                         | IPI00553177.1 | 46707.1  | 4  | 4  |  |  | 9  |
| 443 | Alpha-1B-glycoprotein precursor                                                       | IPI00022895.7 | 54238.7  | 2  | 1  |  |  | 4  |
| 444 | Alpha-2-HS-glycoprotein precursor                                                     | IPI00022431.1 | 39299.7  | 5  | 1  |  |  | 1  |
| 445 | Alpha-2-macroglobulin precursor                                                       | IPI00478003.1 | 163174.3 | 29 | 29 |  |  | 24 |
| 446 | Apolipoprotein A-I precursor                                                          | IPI00021841.1 | 430758.9 | 17 | 9  |  |  | 11 |
| 447 | Apolipoprotein A-II precursor                                                         | IPI00021854.1 | 11167.9  | 3  | 3  |  |  | 4  |
| 448 | Apolipoprotein A-IV precursor                                                         | IPI00304273.2 | 45371.5  | 1  | 1  |  |  | 1  |
| 449 | CDNA FLJ43793 fis, clone TESTI4000014, highly similar to 130 kDa leucine-rich protein | IPI00329745.4 | 158825.1 | 1  | 1  |  |  | 1  |
| 450 | Ceruloplasmin precursor                                                               | IPI00017601.1 | 122127.6 | 9  | 8  |  |  | 8  |
| 451 | Clusterin precursor                                                                   | IPI00291262.3 | 52461.1  | 2  | 2  |  |  | 1  |
| 452 | Complement C4-A precursor                                                             | IPI00032258.4 | 192649.5 | 5  | 3  |  |  | 7  |
| 453 | <b>Guanine nucleotide-binding protein G(I)/G(S)/G(O) gamma-4 subunit precursor</b>    | IPI00030058.1 | 8383.2   | 1  | 1  |  |  | 1  |
| 454 | Hemopexin precursor                                                                   | IPI00022488.1 | 51643.3  | 13 | 4  |  |  | 7  |
| 455 | HERV-K_10p14 provirus ancestral Env polyprotein precursor                             | IPI00414893.1 | 32216.3  | 1  | 2  |  |  | 1  |
| 456 | HP protein                                                                            | IPI00478493.3 | 38427.3  | 2  | 1  |  |  | 2  |
| 457 | HP protein                                                                            | IPI00431645.1 | 31361.9  | 8  | 4  |  |  | 4  |
| 458 | Hypothetical protein DKFZp686I1868                                                    | IPI00029372.2 | 69606.9  | 1  | 1  |  |  | 1  |
| 459 | IGHA1 protein                                                                         | IPI00166866.3 | 53342.3  | 2  | 3  |  |  | 2  |
| 460 | IGHA1 protein                                                                         | IPI00061977.1 | 54119.4  | 3  | 5  |  |  | 1  |
| 461 | IGKV1-5 protein                                                                       | IPI00419424.3 | 26217.9  | 3  | 3  |  |  | 4  |
| 462 | IGL@ protein                                                                          | IPI00154742.6 | 24777.2  | 1  | 2  |  |  | 3  |
| 463 | Inter-alpha-trypsin inhibitor heavy chain H1 precursor                                | IPI00292530.1 | 101325.8 | 2  | 4  |  |  | 3  |
| 464 | Inter-alpha-trypsin inhibitor heavy chain H2 precursor                                | IPI00305461.2 | 106369.8 | 1  | 2  |  |  | 2  |
| 465 | Isoform 1 of Alpha-1-antichymotrypsin precursor                                       | IPI00550991.3 | 50566.1  | 2  | 1  |  |  | 2  |
| 466 | <b>Isoform 1 of ATP-binding cassette sub-family A member 9</b>                        | IPI00216702.2 | 184241.6 | 1  | 1  |  |  | 1  |
| 467 | Isoform 1 of Complement factor B precursor (Fragment)                                 | IPI00019591.1 | 85478.6  | 3  | 3  |  |  | 2  |
| 468 | Isoform 1 of E3 ubiquitin-protein ligase UBR1                                         | IPI00217405.1 | 200079.2 | 1  | 1  |  |  | 1  |
| 469 | Isoform 1 of Fibronectin precursor                                                    | IPI00022418.1 | 262439.5 | 2  | 4  |  |  | 4  |
| 470 | Isoform 1 of Haptoglobin-related protein precursor                                    | IPI00477597.1 | 38982.7  | 2  | 1  |  |  | 1  |
| 471 | Isoform 2 of Alpha-1-antichymotrypsin precursor                                       | IPI00431656.4 | 24018.3  | 2  | 3  |  |  | 1  |
| 472 | Isoform 2 of Inter-alpha-trypsin inhibitor heavy chain H4 precursor                   | IPI00218192.2 | 101146.1 | 2  | 3  |  |  | 1  |

## Supplementary Material (ESI) for Analyst

This journal is (C) The Royal Society of Chemistry 2010

|     |                                                                                                                        |               |          |    |    |    |
|-----|------------------------------------------------------------------------------------------------------------------------|---------------|----------|----|----|----|
| 473 | Isoform HMW of Kininogen-1 precursor                                                                                   | IPI00032328.2 | 71912.1  | 5  | 1  | 2  |
| 474 | <b>Mitochondrial 2-oxoglutarate/malate carrier protein</b>                                                             | IPI00219729.3 | 34039.9  | 1  | 1  | 1  |
| 475 | N-acetylglutamate synthase, mitochondrial precursor                                                                    | IPI00166092.1 | 58120.0  | 1  | 1  | 1  |
| 476 | Plasma protease C1 inhibitor precursor                                                                                 | IPI00291866.5 | 55119.5  | 1  | 3  | 1  |
| 477 | Pregnancy zone protein precursor                                                                                       | IPI00025426.1 | 163732.1 | 1  | 8  | 2  |
| 478 | PRO2275                                                                                                                | IPI00305457.5 | 13088.9  | 6  | 5  | 7  |
| 479 | Prothrombin precursor (Fragment)                                                                                       | IPI00019568.1 | 69992.2  | 2  | 1  | 1  |
| 480 | Scavenger receptor with C-type lectin type I                                                                           | IPI00247616.7 | 81504.7  | 1  | 1  | 1  |
| 481 | Serotransferrin precursor                                                                                              | IPI00022463.1 | 76999.7  | 29 | 23 | 16 |
| 482 | similar to Temporarily Assigned Gene name family member                                                                | IPI00175019.6 | 411453.6 | 1  | 1  | 1  |
| 483 | Transthyretin precursor                                                                                                | IPI00022432.1 | 15877.1  | 4  | 3  | 2  |
| 484 | Tribbles homolog 3                                                                                                     | IPI00290307.3 | 39552.6  | 1  | 1  | 1  |
| 485 | Vitamin D-binding protein precursor                                                                                    | IPI00555812.4 | 52929.1  | 14 | 4  | 8  |
| 486 | Vitronectin precursor                                                                                                  | IPI00298971.1 | 54271.2  | 2  | 2  | 1  |
| 487 | WD repeat protein 52                                                                                                   | IPI00747180.2 | 112886.2 | 1  | 2  | 1  |
| 488 | 10 kDa protein                                                                                                         | IPI00796523.1 | 9996.3   | 1  | 1  | 1  |
| 489 | 19 kDa protein                                                                                                         | IPI00742782.1 | 18519.5  | 1  | 1  | 1  |
| 490 | Alpha-1-acid glycoprotein 2 precursor                                                                                  | IPI00020091.1 | 23587.6  | 1  | 1  | 1  |
| 491 | Apolipoprotein B-100 precursor                                                                                         | IPI00022229.1 | 515241.6 |    | 8  | 14 |
| 492 | Apolipoprotein C-III precursor                                                                                         | IPI00021857.1 | 10845.5  |    | 1  | 2  |
| 493 | Beta-2-glycoprotein 1 precursor                                                                                        | IPI00298828.3 | 38272.7  |    | 1  | 2  |
| 494 | Carboxypeptidase N subunit 2 precursor                                                                                 | IPI00479116.1 | 60576.3  |    | 1  | 1  |
| 495 | Caspase-12                                                                                                             | IPI00432707.2 | 39082.4  |    | 1  | 1  |
| 496 | CDNA FLJ11867 fis, clone HEMBA1006976, weakly similar to H.sapiens Gal-beta(1-3/1-4)GlcNAc alpha-2.3-sialyltransferase | IPI00306884.3 | 40903.1  |    | 1  | 1  |
| 497 | <b>C-type lectin domain family 12 member B</b>                                                                         | IPI00409688.3 | 31595.4  |    | 1  | 1  |
| 498 | DERP12                                                                                                                 | IPI00382990.1 | 38169.0  |    | 1  | 1  |
| 499 | <b>diaphanous 1 isoform 1</b>                                                                                          | IPI00030876.5 | 141257.5 |    | 1  | 2  |
| 500 | Hypothetical protein                                                                                                   | IPI00328894.1 | 15990.3  |    | 1  | 1  |
| 501 | Hypothetical short protein                                                                                             | IPI00791731.1 | 6408.5   |    | 1  | 1  |
| 502 | Isoform 1 of Autophagy-related protein 7                                                                               | IPI00007404.1 | 77909.4  |    | 1  | 1  |
| 503 | Isoform 1 of Chromosome-associated kinesin KIF4A                                                                       | IPI00178150.5 | 139793.3 |    | 1  | 2  |
| 504 | Isoform 1 of Complement factor H precursor                                                                             | IPI00029739.4 | 138978.4 |    | 10 | 2  |
| 505 | Isoform 1 of Myosin-VIIa                                                                                               | IPI00013193.3 | 254242.5 |    | 1  | 1  |
| 506 | <b>Isoform 1 of Nesprin-2</b>                                                                                          | IPI00239405.4 | 795954.9 |    | 1  | 2  |
| 507 | <b>Isoform 1 of Protein KIAA0317</b>                                                                                   | IPI00006561.3 | 94162.6  |    | 1  | 1  |
| 508 | Isoform 1 of Uncharacterized protein C16orf48                                                                          | IPI00030272.4 | 38735.4  |    | 1  | 2  |
| 509 | Isoform 1 of Zinc finger homeobox protein 4                                                                            | IPI00328754.5 | 393481.6 |    | 1  | 1  |
| 510 | Isoform 5 of Dipeptidyl peptidase 8                                                                                    | IPI00026036.3 | 97676.8  |    | 1  | 1  |
| 511 | Isoform Alpha of Tripartite motif-containing protein 29                                                                | IPI00073096.3 | 65793.4  |    | 1  | 1  |
| 512 | Keratin, type II cytoskeletal 1                                                                                        | IPI00220327.3 | 65977.9  |    | 5  | 1  |
| 513 | <b>KIAA1529</b>                                                                                                        | IPI00292836.4 | 190977.9 |    | 1  | 1  |
| 514 | Kinesin heavy chain                                                                                                    | IPI00012837.1 | 109616.9 |    | 2  | 4  |
| 515 | Midasin                                                                                                                | IPI00167941.1 | 632425.4 |    | 1  | 1  |
| 516 | Plasminogen precursor                                                                                                  | IPI00019580.1 | 90510.2  |    | 2  | 1  |
| 517 | Probable ATP-dependent RNA helicase DDX43                                                                              | IPI00032899.4 | 72827.5  |    | 1  | 2  |
| 518 | Similar to Nitric oxide synthase, inducible                                                                            | IPI00783653.1 | 130446.0 |    | 1  | 1  |
| 519 | Ubiquitously transcribed X chromosome tetratricopeptide repeat protein                                                 | IPI00007362.1 | 154134.2 |    | 1  | 1  |
| 520 | Vigilin                                                                                                                | IPI00022228.1 | 141352.0 |    | 1  | 1  |
| 521 | Zinc finger protein 618                                                                                                | IPI00291843.3 | 104889.1 |    | 1  | 1  |
| 522 | 13 kDa protein                                                                                                         | IPI00795939.1 | 13460.9  | 1  |    | 1  |
| 523 | 26S proteasome non-ATPase regulatory subunit 10                                                                        | IPI00003565.1 | 24412.4  | 1  |    | 1  |
| 524 | 68 kDa protein                                                                                                         | IPI00550587.4 | 67925.9  | 1  |    | 1  |
| 525 | A-kinase anchor protein 3                                                                                              | IPI00290854.1 | 94676.4  | 1  |    | 1  |
| 526 | Alpha-1-acid glycoprotein 1 precursor                                                                                  | IPI00022429.3 | 23496.8  | 3  |    | 2  |
| 527 | AMBP protein precursor                                                                                                 | IPI00022426.1 | 38974.0  | 1  |    | 1  |
| 528 | Angiotensinogen precursor                                                                                              | IPI00032220.3 | 53120.6  | 1  |    | 1  |
| 529 | Antithrombin III variant                                                                                               | IPI00032179.2 | 52658.0  | 4  |    | 2  |
| 530 | BTB (POZ) domain containing 12                                                                                         | IPI00291796.2 | 199887.3 | 1  |    | 1  |

## Supplementary Material (ESI) for Analyst

This journal is (C) The Royal Society of Chemistry 2010

|     |                                                                                                    |               |          |   |   |
|-----|----------------------------------------------------------------------------------------------------|---------------|----------|---|---|
| 531 | Centromere protein C 1                                                                             | IPI00304885.1 | 106860.4 | 1 | 1 |
| 532 | Connexin                                                                                           | IPI00307281.3 | 14001.0  | 1 | 1 |
| 533 | Conserved hypothetical protein                                                                     | IPI00749060.1 | 10412.1  | 1 | 1 |
| 534 | Isoform 1 of Actin-binding LIM protein 3                                                           | IPI00185892.3 | 77751.7  | 1 | 1 |
| 535 | <b>Isoform 1 of Clathrin heavy chain 2</b>                                                         | IPI00022881.1 | 186909.4 | 1 | 2 |
| 536 | Isoform 1 of DNA (cytosine-5)-methyltransferase 1                                                  | IPI00031519.3 | 189445.7 | 1 | 1 |
| 537 | Isoform 1 of Probable nucleolar complex protein 14                                                 | IPI00022613.4 | 97607.5  | 1 | 2 |
| 538 | Isoform 1 of Torsin-3A precursor                                                                   | IPI00301631.5 | 46169.4  | 1 | 1 |
| 539 | Isoform 1 of Uncharacterized protein C10orf68                                                      | IPI00413658.5 | 71462.6  | 1 | 1 |
| 540 | Isoform 2 of LON peptidase N-terminal domain and RING finger protein 2                             | IPI00394812.3 | 57433.8  | 1 | 1 |
| 541 | <b>Isoform 2 of Multidrug resistance-associated protein 1</b>                                      | IPI00008338.1 | 164834.4 | 1 | 1 |
| 542 | Isoform 2 of Zinc finger protein basonuclin-2                                                      | IPI00014826.6 | 101268.9 | 2 | 2 |
| 543 | Isoform 4 of Intersectin-2                                                                         | IPI00216423.1 | 134928.7 | 1 | 1 |
| 544 | Isoform 5 of Transcription initiation factor TFIID subunit 1                                       | IPI00827757.1 | 32457.1  | 1 | 1 |
| 545 | Latrophilin-2 (Fragment)                                                                           | IPI00645074.1 | 4510.2   | 2 | 1 |
| 546 | minichromosome maintenance protein 10 isoform 2                                                    | IPI00164354.5 | 98022.4  | 1 | 1 |
| 547 | <b>Opsin-5</b>                                                                                     | IPI00395810.1 | 39700.7  | 2 | 2 |
| 548 | <b>Plexin-C1 precursor</b>                                                                         | IPI00024766.1 | 175629.5 | 1 | 1 |
| 549 | Protein RMI1 homolog                                                                               | IPI00017203.5 | 70073.4  | 1 | 1 |
| 550 | Protein-arginine deiminase type-2                                                                  | IPI00294187.1 | 75515.5  | 1 | 1 |
| 551 | Signal recognition particle 72 kDa protein similar to alpha 3 type VI collagen isoform 1 precursor | IPI00215888.4 | 74560.1  | 1 | 1 |
| 552 |                                                                                                    | IPI00739954.2 | 271668.4 | 2 | 3 |
| 553 | similar to deubiquitinating enzyme 3                                                               | IPI00398228.1 | 59596.4  | 1 | 1 |
| 554 | WDR86 protein                                                                                      | IPI00328560.2 | 26771.5  | 1 | 1 |
| 555 | WW domain-binding protein 11                                                                       | IPI00170786.1 | 69954.1  | 1 | 1 |
| 556 | zinc finger protein 262                                                                            | IPI00477949.1 | 172676.2 | 1 | 1 |
| 557 | zinc finger, ZZ type with EF hand domain 1                                                         | IPI00385631.5 | 330861.9 | 1 | 2 |
| 558 | 100 kDa protein                                                                                    | IPI00220116.6 | 99658.4  |   | 1 |
| 559 | 12 kDa protein                                                                                     | IPI00793330.1 | 12244.6  |   | 1 |
| 560 | 13 kDa protein                                                                                     | IPI00796830.1 | 12984.4  |   | 1 |
| 561 | 136 kDa protein                                                                                    | IPI00005625.2 | 135595.6 |   | 1 |
| 562 | 147 kDa protein                                                                                    | IPI00002353.1 | 147375.3 |   | 1 |
| 563 | 15 kDa selenoprotein isoform 1 precursor                                                           | IPI00030877.2 | 18033.2  |   | 1 |
| 564 | 19 kDa protein                                                                                     | IPI00793591.1 | 18801.5  |   | 1 |
| 565 | 221 kDa protein                                                                                    | IPI00465135.2 | 220978.1 |   | 1 |
| 566 | 24 kDa protein                                                                                     | IPI00446663.3 | 23619.9  |   | 1 |
| 567 | 36 kDa protein                                                                                     | IPI00173558.2 | 35712.1  |   | 1 |
| 568 | 53 kDa protein                                                                                     | IPI00455607.3 | 52595.2  |   | 1 |
| 569 | <b>5-hydroxytryptamine (serotonin) receptor 3B precursor</b>                                       | IPI00005673.2 | 50259.8  |   | 1 |
| 570 | 8 kDa protein                                                                                      | IPI00793386.1 | 8244.1   |   | 1 |
| 571 | <b>Adiponutrin</b>                                                                                 | IPI00019245.4 | 52830.9  |   | 1 |
| 572 | <b>Alkyldihydroxyacetonephosphate synthase, peroxisomal precursor</b>                              | IPI00010349.1 | 72865.9  |   | 1 |
| 573 | <b>Alpha-2,8-sialyltransferase 8B</b>                                                              | IPI00020199.1 | 42403.2  |   | 1 |
| 574 | Apolipoprotein C-II precursor                                                                      | IPI00021856.3 | 11276.8  |   | 1 |
| 575 | arylhydrocarbon receptor repressor                                                                 | IPI00718806.2 | 78256.6  |   | 1 |
| 576 | Brefeldin A-inhibited guanine nucleotide-exchange protein 1                                        | IPI00002188.2 | 208633.2 |   | 1 |
| 577 | C12orf48 protein                                                                                   | IPI00448949.4 | 15398.6  |   | 1 |
| 578 | Carbonic anhydrase 5B, mitochondrial precursor                                                     | IPI00032055.1 | 36410.5  |   | 1 |
| 579 | Caskin-2                                                                                           | IPI00103516.1 | 126633.8 |   | 1 |
| 580 | CASP8 and FADD-like apoptosis regulator variant (Fragment)                                         | IPI00556163.1 | 29023.3  |   | 1 |
| 581 | <b>Cation-independent mannose-6-phosphate receptor precursor</b>                                   | IPI00289819.4 | 274097.6 |   | 1 |
| 582 | CDNA FLJ11142 fis, clone PLACE1006552                                                              | IPI00295380.7 | 47461.7  |   | 1 |
| 583 | CDNA FLJ20558 fis, clone KAT11870                                                                  | IPI00016594.2 | 64036.2  |   | 1 |
| 584 | CDNA FLJ25874 fis, clone CBR02446 (Fragment)                                                       | IPI00297587.3 | 32140.7  |   | 1 |
| 585 | CDNA FLJ26204 fis, clone ADG07455                                                                  | IPI00442924.1 | 16245.9  |   | 1 |
| 586 | CDNA FLJ30491 fis, clone BRAWH2000177, moderately similar to SERINE                                | IPI00386540.2 | 15609.8  |   | 1 |

| HYDROXYMETHYLTRANSFERASE,<br>MITOCHONDRIAL |                                                                                 |               |          |   |
|--------------------------------------------|---------------------------------------------------------------------------------|---------------|----------|---|
| 587                                        | CDNA FLJ35552 fis, clone SPLEN2004346                                           | IPI00180515.2 | 67753.9  | 1 |
| 588                                        | CDNA FLJ38561 fis, clone HCHON2003676                                           | IPI00167550.1 | 16430.8  | 1 |
| 589                                        | CDNA FLJ41805 fis, clone NOVAR2000962                                           | IPI00446354.1 | 13506.9  | 1 |
| 590                                        | CDNA FLJ45909 fis, clone PEBLM2001803                                           | IPI00394804.3 | 64625.6  | 1 |
| 591                                        | CDNA PSEC0211 fis, clone HEMBA1003728                                           | IPI00383978.1 | 23714.9  | 1 |
| 592                                        | CLIP1 protein                                                                   | IPI00013455.8 | 162146.1 | 1 |
| 593                                        | Collagen alpha-1(V) chain precursor                                             | IPI00477611.1 | 183495.2 | 1 |
| 594                                        | Collagen, type XXVII, alpha 1                                                   | IPI00514898.1 | 73591.1  | 1 |
| 595                                        | Complement C1r subcomponent precursor                                           | IPI00296165.5 | 80121.9  | 1 |
| 596                                        | Conserved hypothetical protein                                                  | IPI00747576.1 | 26178.0  | 1 |
| 597                                        | Corticosteroid-binding globulin precursor                                       | IPI00027482.1 | 45112.0  | 1 |
| 598                                        | Cullin-7                                                                        | IPI00001690.1 | 191067.3 | 1 |
| 599                                        | <b>Cyclin M2</b>                                                                | IPI00006084.4 | 96645.9  | 1 |
| 600                                        | <b>Cysteine-rich hydrophobic domain 2 protein</b>                               | IPI00015878.1 | 19241.6  | 2 |
| 601                                        | Cytochrome P450, family 46 variant (Fragment)                                   | IPI00556591.1 | 23547.0  | 1 |
| 602                                        | cytoplasmic FMR1 interacting protein 1 isoform b                                | IPI00550212.3 | 94405.5  | 1 |
| 603                                        | Death-associated protein kinase 3                                               | IPI00015213.1 | 52503.5  | 1 |
| 604                                        | Disintegrin domain containing protein                                           | IPI00479027.2 | 39246.2  | 1 |
| 605                                        | <b>dispatched B</b>                                                             | IPI00304587.4 | 151906.0 | 1 |
| 606                                        | DnaJ homolog subfamily B member 1                                               | IPI00015947.5 | 38020.4  | 2 |
| 607                                        | Dopey family member 1                                                           | IPI00010903.2 | 266391.7 | 1 |
| 608                                        | Ectonucleotide pyrophosphatase/phosphodiesterase 3                              | IPI00478342.2 | 11299.0  | 1 |
| 609                                        | EH domain-binding protein 1                                                     | IPI00178187.2 | 139930.9 | 2 |
| 610                                        | F-box only protein 47                                                           | IPI00550126.1 | 51961.8  | 1 |
| 611                                        | Fibrillin-1 precursor                                                           | IPI00328113.2 | 312097.0 | 2 |
| 612                                        | FLJ00182 protein                                                                | IPI00163578.4 | 101699.4 | 1 |
| 613                                        | FLJ90013 protein                                                                | IPI00166468.2 | 64218.4  | 1 |
| 614                                        | Galactoside 3(4)-L-fucosyltransferase                                           | IPI00007671.1 | 42090.3  | 1 |
| 615                                        | Golgin subfamily B member 1                                                     | IPI00004671.1 | 375846.5 | 1 |
| 616                                        | Heat shock 70 kDa protein 4                                                     | IPI00002966.1 | 94240.2  | 1 |
| 617                                        | Hypothetical protein                                                            | IPI00383005.1 | 7440.1   | 1 |
| 618                                        | Hypothetical protein                                                            | IPI00514661.1 | 170656.0 | 1 |
| 619                                        | hypothetical protein                                                            | IPI00746416.2 | 48214.2  | 1 |
| 620                                        | Hypothetical protein DKFZp434O1520                                              | IPI00646529.2 | 97789.5  | 1 |
| 621                                        | Hypothetical protein FHL2                                                       | IPI00029108.5 | 23315.7  | 2 |
| 622                                        | hypothetical protein LOC55196                                                   | IPI00018808.3 | 194734.9 | 1 |
| 623                                        | hypothetical protein LOC57683                                                   | IPI00397930.3 | 265450.8 | 1 |
| 624                                        | hypothetical protein LOC9768 isoform 2                                          | IPI00645835.2 | 7216.8   | 1 |
| 625                                        | Hypothetical short protein                                                      | IPI00744389.2 | 6723.4   | 1 |
| 626                                        | Ig heavy chain V-III region BRO                                                 | IPI00382480.1 | 13218.4  | 1 |
| 627                                        | Isocitrate dehydrogenase [NAD] subunit gamma, mitochondrial precursor           | IPI00220150.4 | 42767.1  | 1 |
| 628                                        | <b>Isoform 1 of Cadherin EGF LAG seven-pass G-type receptor 1 precursor</b>     | IPI00003384.1 | 329276.7 | 1 |
| 629                                        | Isoform 1 of Centaurin-gamma 1                                                  | IPI00217393.1 | 124597.6 | 1 |
| 630                                        | Isoform 1 of Centrosomal protein of 110 kDa                                     | IPI00011933.2 | 113370.6 | 1 |
| 631                                        | Isoform 1 of Dedicator of cytokinesis protein 10                                | IPI00333770.6 | 249371.0 | 1 |
| 632                                        | Isoform 1 of Deleted in bladder cancer protein 1 precursor                      | IPI00005607.2 | 88703.4  | 1 |
| 633                                        | Isoform 1 of Developmentally-regulated RNA-binding protein 1                    | IPI00216750.1 | 53468.9  | 1 |
| 634                                        | Isoform 1 of Epidermal growth factor receptor kinase substrate 8-like protein 2 | IPI00414315.8 | 80570.2  | 1 |
| 635                                        | Isoform 1 of Glial fibrillary acidic protein, astrocyte                         | IPI00025363.1 | 49849.7  | 1 |
| 636                                        | Isoform 1 of Glycerol-3-phosphate dehydrogenase, mitochondrial precursor        | IPI00017895.2 | 80782.6  | 1 |
| 637                                        | Isoform 1 of Hematological and neurological expressed 1-like protein            | IPI00027397.3 | 20051.0  | 1 |
| 638                                        | Isoform 1 of Histone-lysine N-methyltransferase, H3 lysine-9 specific 5         | IPI00015526.3 | 138166.0 | 1 |
| 639                                        | Isoform 1 of Kinesin family member 21A                                          | IPI00425404.1 | 187061.5 | 1 |
| 640                                        | Isoform 1 of Leucine carboxyl methyltransferase 1                               | IPI00296370.2 | 38808.3  | 1 |

## Supplementary Material (ESI) for Analyst

This journal is (C) The Royal Society of Chemistry 2010

|     |                                                                                         |               |           |   |
|-----|-----------------------------------------------------------------------------------------|---------------|-----------|---|
| 641 | Isoform 1 of Mediator of DNA damage checkpoint protein 1                                | IPI00552897.2 | 226526.6  | 1 |
| 642 | Isoform 1 of Obscurin                                                                   | IPI00288940.5 | 867957.3  | 1 |
| 643 | Isoform 1 of Protein inscuteable homolog                                                | IPI00398916.6 | 63428.2   | 1 |
| 644 | <b>Isoform 1 of Protocadherin-17 precursor</b>                                          | IPI00645206.2 | 126150.8  | 2 |
| 645 | <b>Isoform 1 of Serine/threonine-protein kinase PINK1, mitochondrial precursor</b>      | IPI00307065.3 | 62729.0   | 1 |
| 646 | <b>Isoform 1 of Solute carrier family 22 member 11</b>                                  | IPI00020542.3 | 59932.6   | 1 |
| 647 | Isoform 1 of Synembryn-B                                                                | IPI00018771.3 | 60801.5   | 1 |
| 648 | <b>Isoform 1 of Tripartite motif-containing protein 72</b>                              | IPI00301028.4 | 52697.2   | 1 |
| 649 | Isoform 1 of Uncharacterized protein C12orf54                                           | IPI00166903.4 | 14476.1   | 1 |
| 650 | <b>Isoform 2 of Aquaporin-4</b>                                                         | IPI00022799.1 | 34807.0   | 1 |
| 651 | Isoform 2 of Engulfment and cell motility protein 2                                     | IPI00101924.2 | 54410.8   | 1 |
| 652 | Isoform 2 of Exosome complex exonuclease RRP44                                          | IPI00183462.7 | 105158.1  | 1 |
| 653 | Isoform 2 of Kinase suppressor of ras-1                                                 | IPI00013384.3 | 97054.2   | 1 |
| 654 | Isoform 2 of Myosin light chain kinase, smooth muscle                                   | IPI00221255.1 | 203000.2  | 1 |
| 655 | Isoform 2 of PDZ domain-containing protein 2                                            | IPI00155647.8 | 280620.7  | 1 |
| 656 | Isoform 2 of Phosphatidylinositol 3,4,5-trisphosphate-dependent Rac exchanger 1 protein | IPI00218429.1 | 106026.6  | 1 |
| 657 | Isoform 2 of Platelet-derived growth factor D precursor                                 | IPI00011865.2 | 42139.9   | 1 |
| 658 | Isoform 2 of Ryanodine receptor 3                                                       | IPI00217185.1 | 551019.9  | 1 |
| 659 | Isoform 3 of Serine/threonine-protein phosphatase 2B catalytic subunit beta isoform     | IPI00181738.2 | 57945.1   | 1 |
| 660 | Isoform 4 of Nesprin-1                                                                  | IPI00247295.3 | 1004590.0 | 1 |
| 661 | Isoform 4 of Paired box protein Pax-8                                                   | IPI00183926.4 | 34887.4   | 1 |
| 662 | <b>Isoform 6 of Pro-neuregulin-2, membrane-bound isoform precursor</b>                  | IPI00003044.1 | 45669.0   | 1 |
| 663 | Isoform Alpha of Protein vav-3                                                          | IPI00299763.1 | 97713.6   | 1 |
| 664 | Isoform Long of Dual specificity protein kinase CLK1                                    | IPI00028061.3 | 57169.5   | 1 |
| 665 | Isoform Long of Dual specificity tyrosine-phosphorylation-regulated kinase 1A           | IPI00014344.1 | 85530.1   | 1 |
| 666 | Isoform Long of E3 ubiquitin-protein ligase CBL-B                                       | IPI00292856.4 | 109380.5  | 1 |
| 667 | <b>Isoform Long of Short transient receptor potential channel 1</b>                     | IPI00012081.1 | 91152.9   | 1 |
| 668 | Isoform Long of Splicing factor, proline- and glutamine-rich                            | IPI00010740.1 | 76101.8   | 1 |
| 669 | Isoform OS-9-2 of Protein OS-9 precursor                                                | IPI00186581.7 | 69349.7   | 1 |
| 670 | Isoform PDE4B1 of cAMP-specific 3',5'-cyclic phosphodiesterase 4B                       | IPI00016604.1 | 83290.8   | 1 |
| 671 | Jumonji protein                                                                         | IPI00023756.2 | 138647.6  | 1 |
| 672 | Leucyl-tRNA synthetase, cytoplasmic                                                     | IPI00103994.4 | 134379.5  | 1 |
| 673 | LOC116349 protein                                                                       | IPI00401081.5 | 12653.3   | 1 |
| 674 | <b>Low-density lipoprotein receptor-related protein 1 precursor</b>                     | IPI00020557.1 | 504243.2  | 2 |
| 675 | Methionyl-tRNA synthetase, mitochondrial precursor                                      | IPI00062839.4 | 66548.9   | 1 |
| 676 | Mitogen-activated protein kinase kinase kinase 14                                       | IPI00016099.2 | 103976.0  | 3 |
| 677 | Msx2-interacting protein                                                                | IPI00045914.1 | 402004.3  | 1 |
| 678 | MutS protein homolog 4                                                                  | IPI00289914.1 | 104689.2  | 1 |
| 679 | <b>NADH dehydrogenase [ubiquinone] 1 beta subcomplex subunit 6</b>                      | IPI00219385.3 | 15479.1   | 1 |
| 680 | Nebulin                                                                                 | IPI00303335.1 | 772742.8  | 1 |
| 681 | NINP6167                                                                                | IPI00432739.1 | 15095.5   | 1 |
| 682 | Novel protein                                                                           | IPI00513924.1 | 10233.1   | 1 |
| 683 | Nucleolar protein Nop56                                                                 | IPI00411937.4 | 66008.8   | 1 |
| 684 | Nucleoside diphosphate kinase homolog 5                                                 | IPI00010261.1 | 24220.6   | 1 |
| 685 | Olfactory receptor 17-1                                                                 | IPI00021122.1 | 32000.6   | 1 |
| 686 | <b>Olfactory receptor 6M1</b>                                                           | IPI00398850.1 | 35304.9   | 1 |
| 687 | <b>P2Y purinoceptor 11</b>                                                              | IPI00101425.2 | 40318.9   | 1 |
| 688 | Piwi-like protein 2                                                                     | IPI00154664.1 | 109777.9  | 1 |

## Supplementary Material (ESI) for Analyst

This journal is (C) The Royal Society of Chemistry 2010

|     |                                                                            |               |          |   |
|-----|----------------------------------------------------------------------------|---------------|----------|---|
| 689 | PNAS-138                                                                   | IPI00382460.1 | 5614.7   | 2 |
| 690 | Poly [ADP-ribose] polymerase 1                                             | IPI00449049.5 | 113012.4 | 1 |
| 691 | Probable ATP-dependent RNA helicase DDX20                                  | IPI00005904.3 | 92182.5  | 1 |
| 692 | Probable ATP-dependent RNA helicase DHX35                                  | IPI00030288.2 | 78860.2  | 1 |
| 693 | Prolargin precursor                                                        | IPI00020987.1 | 43782.2  | 1 |
| 694 | Protein KIAA1109                                                           | IPI00398012.4 | 554948.0 | 1 |
| 695 | Protein KIAA1546                                                           | IPI00026533.5 | 130172.5 | 1 |
| 696 | Protocadherin 15                                                           | IPI00290035.3 | 216201.5 | 1 |
| 697 | regeneration associated muscle protease isoform a                          | IPI00064429.4 | 81889.4  | 1 |
| 698 | RNF157 protein                                                             | IPI00386730.3 | 42525.2  | 1 |
| 699 | rotatin                                                                    | IPI00645947.1 | 248452.1 | 1 |
| 700 | Serine/threonine-protein kinase PRKX                                       | IPI00020904.1 | 40870.1  | 1 |
| 701 | SH3-domain kinase binding protein 1                                        | IPI00641861.1 | 16401.2  | 1 |
| 702 | similar to heat shock 70kD protein binding protein                         | IPI00737448.1 | 14168.7  | 1 |
| 703 | similar to Kinase suppressor of ras-1                                      | IPI00399198.4 | 31984.4  | 1 |
| 704 | similar to phosphodiesterase 4D interacting protein isoform 2              | IPI00741074.1 | 15733.9  | 2 |
| 705 | similar to TPR domain, ankyrin-repeat and coiled-coil-containing isoform 1 | IPI00030466.5 | 209981.3 | 1 |
| 706 | similar to Vac14 homolog                                                   | IPI00787397.1 | 135792.3 | 1 |
| 707 | similar to zinc finger protein 285                                         | IPI00454738.2 | 69643.4  | 1 |
| 708 | similar to Zinc finger protein 292 isoform 1                               | IPI00164352.6 | 304621.1 | 1 |
| 709 | SMARCA4 isoform 2                                                          | IPI00029822.3 | 188030.2 | 1 |
| 710 | Sphingosine kinase 1                                                       | IPI00182048.7 | 42490.0  | 1 |
| 711 | stretch responsive protein 278 isoform a                                   | IPI00395940.7 | 52527.5  | 1 |
| 712 | Succinyl-CoA ligase [GDP-forming] beta-chain, mitochondrial precursor      | IPI00096066.2 | 46481.5  | 1 |
| 713 | <b>Taste receptor type 2 member 13</b>                                     | IPI00028332.1 | 35095.1  | 1 |
| 714 | <b>Taste receptor type 2 member 41</b>                                     | IPI00221132.1 | 35888.3  | 1 |
| 715 | <b>Teneurin-3</b>                                                          | IPI00398020.7 | 300757.7 | 1 |
| 716 | Transforming growth factor beta-1 precursor                                | IPI00000075.3 | 44312.8  | 1 |
| 717 | <b>Tumor necrosis factor (Ligand) superfamily, member 15</b>               | IPI00643268.1 | 20099.2  | 1 |
| 718 | <b>Tyrosine-protein phosphatase non-receptor type 4</b>                    | IPI00019949.1 | 105843.9 | 1 |
| 719 | UbcH10 binding protein with a hect-like domain                             | IPI00376330.8 | 37896.2  | 1 |
| 720 | Uncharacterized protein C5orf23                                            | IPI00002247.2 | 13765.0  | 1 |
| 721 | Uncharacterized protein C6orf146                                           | IPI00217605.2 | 57384.1  | 1 |
| 722 | <b>UPF0258 protein KIAA1024</b>                                            | IPI00167867.5 | 102928.1 | 1 |
| 723 | V_segment translation product (Fragment)                                   | IPI00807336.1 | 12197.2  | 1 |
| 724 | Voltage-dependent L-type calcium channel subunit alpha-1S                  | IPI00299240.4 | 212418.5 | 1 |
| 725 | von Willebrand factor A domain-containing protein 2                        | IPI00394834.3 | 81960.1  | 1 |
| 726 | Xanthine dehydrogenase/oxidase                                             | IPI00244391.3 | 146329.8 | 1 |
| 727 | zinc finger CCCH-type containing 13                                        | IPI00016472.4 | 184758.8 | 1 |
| 728 | Zinc finger protein 471                                                    | IPI00333859.2 | 72961.3  | 1 |
| 729 | zinc finger protein 609                                                    | IPI00307591.5 | 151097.1 | 1 |
